# Supplementary material for: The loss of P2X7 receptor expression leads to increase intestinal glucose transit and hepatic steatosis
Source: PubMed Central journal article supplement (PMC5635021; doi:10.1038/s41598-017-13300-8), 2017-10-10
Supplement: 41598_2017_13300_MOESM2_ESM.pdf [file 41598_2017_13300_MOESM2_ESM.pdf]

**The loss of P2X7 receptor expression leads to increase intestinal glucose transit and hepatic steatosis**

Guillaume Arguin<sup>¶</sup>, Jean-François Bourzac<sup>¶</sup>, Morgane Placet, Caroline M. Molle, Michel Paquette, Jean-François Beaudoin, Jacques A. Rousseau, Roger Lecomte, Mélanie Plourde, and Fernand-Pierre Gendron

<sup>¶</sup> Both authors have contributed equally to this work.

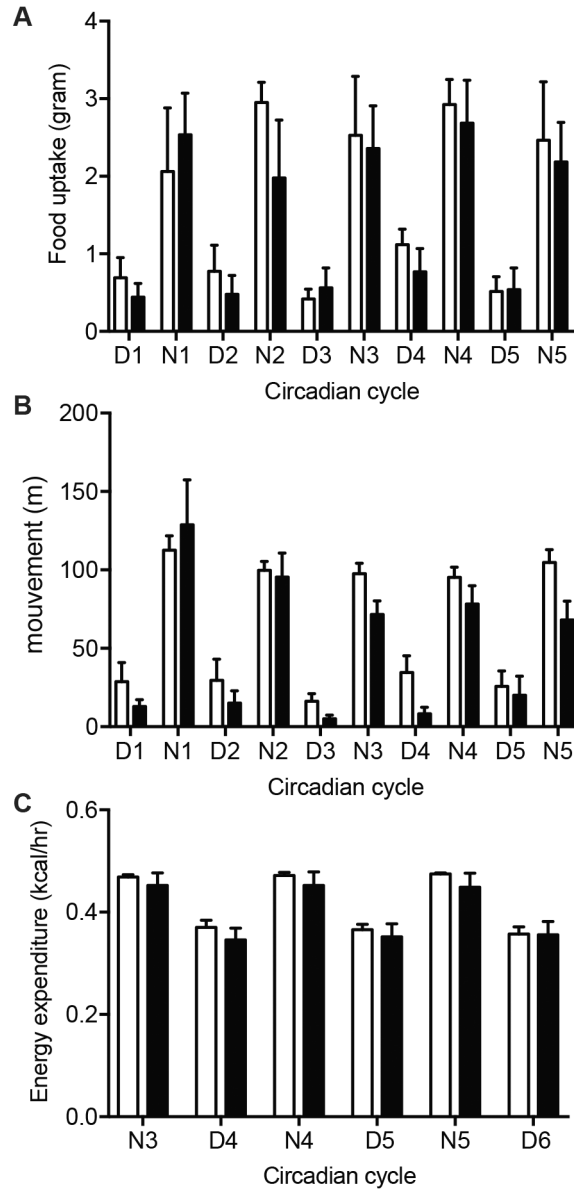

**Supplemental Fig. 1. The increase weight observed for  $P2rx7^{-/-}$  mice was not the result of increase food uptake or a reduction of animal movement or energy expenditure.** The Promethion high-definition room calorimetric system was used to automatically monitored (A) food uptake, (B) animal movement and (C) total energy expenditure (EE). Four  $P2rx7^{+/+}$  and four  $P2rx7^{-/-}$  mice were used for this study. Results are presented as the mean  $\pm$  SEM over a 5-day period for food uptake and movement and over a 3-day period for EE, where D = day time (6h – 20h) and N = night time (20h – 6h). No significant difference could be measured between both animal groups.

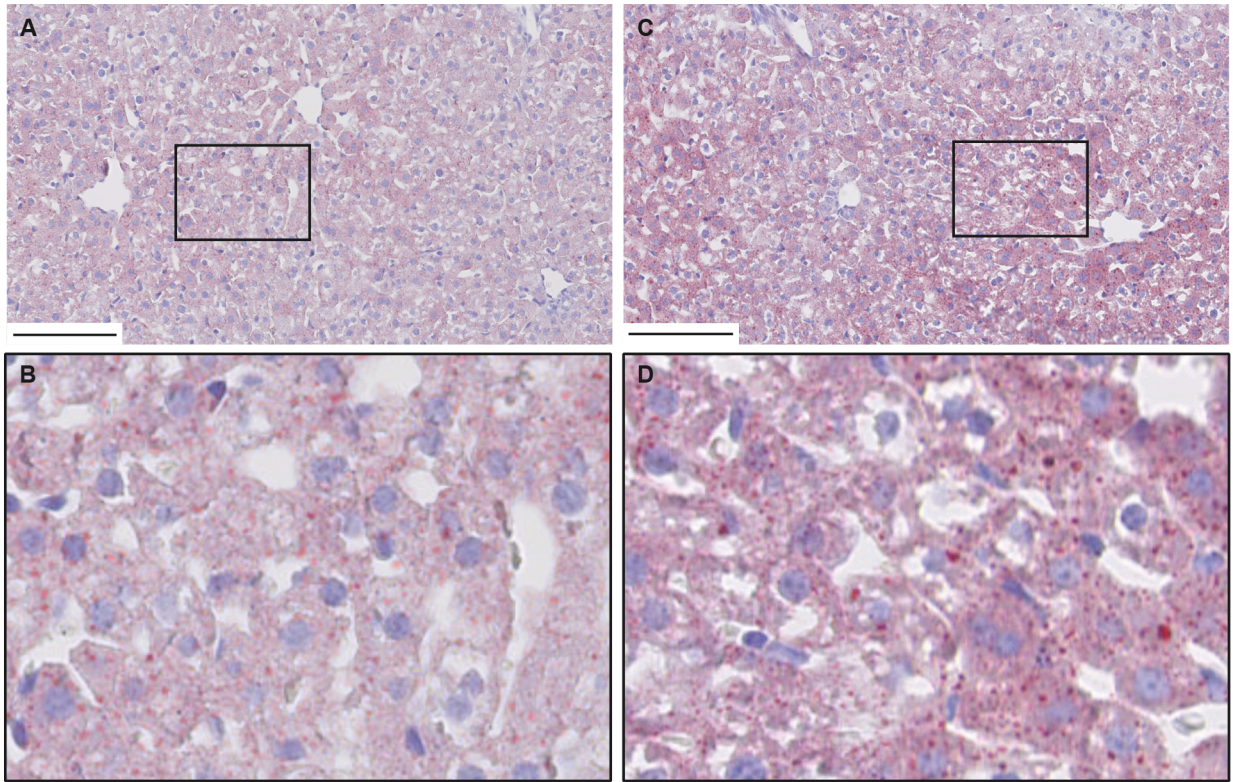

**Supplemental Fig. 2. Increase magnification of Oil red O-stained hepatic tissue sections of 21-day old mice showing cytoplasmic lipid deposition.** A) Oil red O-staining at 40x for *P2rx7*<sup>+/+</sup> mouse and (B) Higher zoom of the zone delineate by the black box in panel A showing weak lipid staining in hepatocyte cytoplasm. C) Lipid staining with Oil red O at 40x magnification for *P2rx7*<sup>-/-</sup> animals, with a higher magnification of the delineated zone (black box) shown in panel D. Scale bars = 100  $\mu$ m.
